# Supplementary material
Source: HighWire-hosted journal article supplement (http://www.qdcxjkg.com/highwire/filestream/113652/field_highwire_adjunct_files/0/ERJ-00177-2012_Disclosures.pdf)
Supplement: ERJ-00177-2012_Disclosures.pdf [file ERJ-00177-2012_Disclosures.pdf]

**A. Gavaldà** is an employee of Almirall.

**M. Miralpeix** is an employee of Almirall.

**E.J. Morcillo** has received a research grant from Almirall, the study sponsor, who also provided support for copy-editing by C. Bryant (Complete Medical Communications, UK).

**J. Cortijo** has received a research grant from Almirall, the study sponsor, who also provided support for copy-editing by C. Bryant (Complete Medical Communications, UK).
